# Supplementary material for: Selenomethionine reduces the deposition of beta-amyloid plaques by modulating β-secretase and enhancing selenoenzymatic activity in a mouse model of Alzheimer's disease
Source: Royal Society of Chemistry journal article supplement (doi:10.1039/c6mt00117c), 2016-01-01
Supplement: c6mt00117c1.pdf [file c6mt00117c1.pdf]

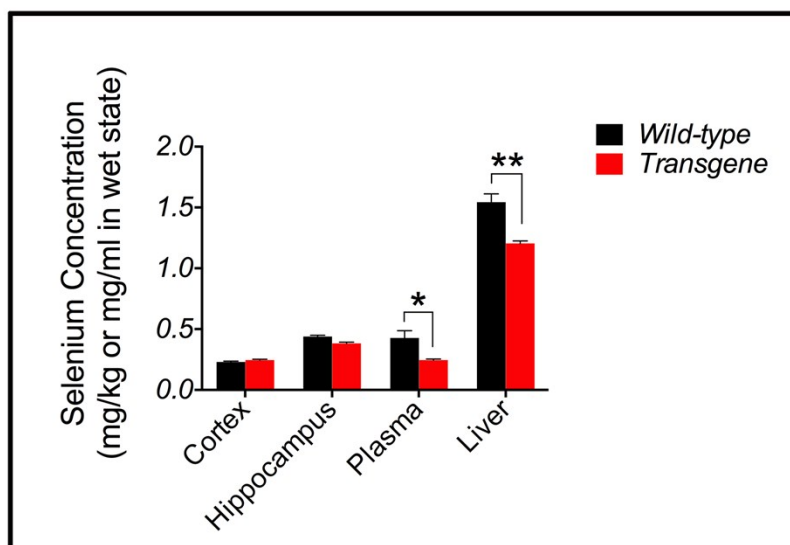

**Supplementary Figure 1. Selenium concentrations in the different tissues of wild type and 3×Tg-AD mice.** The levels of Se declined significantly in both the plasma and liver of 12-month-old 3×Tg-AD mice in comparison with those of wild type (WT) mice. However, there were no changes in both the hippocampus and cortex between the two groups. (Values are expressed as the mean ± SEM (n=4), \*P<0.05, \*\*P<0.01 vs Wt mice).
